# Supplementary material for: Katanin-mediated severing generates microtubules during neurite outgrowth
Source: Research Square preprint supplement (doi:10.21203/rs.3.rs-8782101/v1), 2026-02-10
Supplement: Supplementary file 1 [file bccc9104b1e54b96ced8da57.xlsx]

## Sheet: Supplementary Table 1
Strain name	Genotype	Description
TV28428	tba-1(ok1135) I; wyIs813 II	tba-1(ok1135) = loss of function deletion mutation. wyIs813 = Punc-86::GFP::TBA-1 + Podr-1::RFP.
TV27326	tba-1(ok1135) I; wyIs813 II; wyIs900 X	tba-1(ok1135) = loss of function deletion mutation. wyIs813 = Punc-86::GFP::TBA-1 + Podr-1::RFP. wyIs900 = Plin-32::mCherry::PH + Punc-122::RFP.
TV28427	tba-1(ok1135) I; wyIs813 II; wySi919 V	tba-1(ok1135) = loss of function deletion mutation. wyIs813 = Punc-86::GFP::TBA-1 + Podr-1::RFP. wySi919 = Pdes-2::myr-mScarlet::let-858 3' UTR.
TV30275	tba-1(wy2063) I; wyIs969 IV	tba-1(wy2063) = endogenous GFP::FLPon::TBA-1. wyIs969 = Plin-32::FLP + Podr-1::RFP.
TV28429	tba-1(ok1135) mei-1(or1178) I; wyIs813 II; wySi919 V	tba-1(ok1135) = loss of function deletion mutation. mei-1(or1178) = D166A missense mutation. wyIs813 = Punc-86::GFP::TBA-1 + Podr-1::RFP. wySi919 = Pdes-2::myr-mScarlet::let-858 3' UTR.
TV29494	tba-1(ok1135) mei-1(or1178) I; wyIs813 II; wySi919 V; wyEx10729	tba-1(ok1135) = loss of function deletion mutation. mei-1(or1178) = D166A missense mutation. wyIs813 = Punc-86::GFP::TBA-1 + Podr-1::RFP. wySi919 = Pdes-2::myr-mScarlet::let-858 3' UTR. wyEx10729 = Punc-86::MEI-1 + Podr-1::GFP.
TV29614	tba-1(ok1135) I; wyIs813 II; spas-1(tm683) V; wyIs900 X	tba-1(ok1135) = loss of function deletion mutation. wyIs813 = Punc-86::GFP::TBA-1 + Podr-1::RFP. spas-1(tm683) = loss of function deletion mutation. wyIs900 = Plin-32::mCherry::PH + Punc-122::RFP.
TV27912	tba-1(ok1135) I; wyIs813 II; figl-1tm808)/nT1 V; wyIs900 X	tba-1(ok1135) = loss of function deletion mutation. wyIs813 = Punc-86::GFP::TBA-1 + Podr-1::RFP. figl-1(tm808) = loss of function deletion mutation, balanced by nT1[qIs51]. wyIs900 = Plin-32::mCherry::PH + Punc-122::RFP.
TV30061	F47G4.4(ok2219) tba-1(ok1135) I; wyIs813 II; wySi919 V	F47G4.4(ok2219) = loss of function deletion mutation. tba-1(ok1135) = loss of function deletion mutation. wyIs813 = Punc-86::GFP::TBA-1 + Podr-1::RFP. wySi919 = Pdes-2::myr-mScarlet::let-858 3' UTR.
TV30208	tba-1(ok1135) mei-2(ct98) I; wyIs813 II; wySi919 V	tba-1(ok1135) = loss of function deletion mutation. mei-2(ct98) = A237T missense mutation. wyIs813 = Punc-86::GFP::TBA-1 + Podr-1::RFP. wySi919 = Pdes-2::myr-mScarlet::let-858 3' UTR.
TV30044	F47G4.5(ok2267) tba-1(ok1135) I; wyIs813 II; wySi919 V	F47G4.5(ok2267) = loss of function deletion mutation. tba-1(ok1135) = loss of function deletion mutation. wyIs813 = Punc-86::GFP::TBA-1 + Podr-1::RFP. wySi919 = Pdes-2::myr-mScarlet::let-858 3' UTR.
TV29127	tba-1(ok1135) I; wyIs813 II; wySi919 V; ptrn-1(tm5597) X	tba-1(ok1135) = loss of function deletion mutation. wyIs813 = Punc-86::GFP::TBA-1 + Podr-1::RFP. wySi919 = Pdes-2::myr-mScarlet::let-858 3' UTR. ptrn-1(tm5597) = loss of function deletion mutation.
TV29629	tba-1(ok1135) I; wyIs813 II; wySi919 V; ptrn-1(tm5597) X; wyEx10751	tba-1(ok1135) = loss of function deletion mutation. wyIs813 = Punc-86::GFP::TBA-1 + Podr-1::RFP. wySi919 = Pdes-2::myr-mScarlet::let-858 3' UTR. ptrn-1(tm5597) = loss of function deletion mutation. wyEx10751 = Pdes-2::PTRN-1a + Podr-1::GFP.
TV29126	tba-1(ok1135) nmtn-1(tm5438) I; wyIs813 II; wySi919 V	tba-1(ok1135) = loss of function deletion mutation. nmtn-1(tm5438) = loss of function deletion mutation. wyIs813 = Punc-86::GFP::TBA-1 + Podr-1::RFP. wySi919 = Pdes-2::myr-mScarlet::let-858 3' UTR.
TV30231	tba-1(ok1135) nmtn-1(tm5438) I; wyIs813 II; wySi919 V; wyEx10727	tba-1(ok1135) = loss of function deletion mutation. nmtn-1(tm5438) = loss of function deletion mutation. wyIs813 = Punc-86::GFP::TBA-1 + Podr-1::RFP. wySi919 = Pdes-2::myr-mScarlet::let-858 3' UTR. wyEx10727 = Pdes-2::NMTN-1b + Podr-1::GFP.
TV29519	tba-1(ok1135) I; wyIs813 II; ptrn-1(wy1990) X; wyEx10741	tba-1(ok1135) = loss of function deletion mutation. wyIs813 = Punc-86::GFP::TBA-1 + Podr-1::RFP. ptrn-1(wy1990) = endogenous mScarlet::FLPon::PTRN-1. wyEx10741 = Pwrt-2::FLP + Podr-1::GFP.
TV29526	tba-1(ok1135) nmtn-1(wy1980) I; wyIs813 II; wyEx10743	tba-1(ok1135) = loss of function deletion mutation. nmtn-1(wy1980) = endogenous mScarlet::FLPon::NMTN-1. wyIs813 = Punc-86::GFP::TBA-1 + Podr-1::RFP. wyEx10743= Pwrt-2::FLP + Podr-1::GFP.
TV29600	tba-1(ok1135) mei-1(or1178) I; wyIs813 II; ptrn-1(wy1990) X; wyEx10741	tba-1(ok1135) = loss of function deletion mutation. mei-1(or1178) = D166A missense mutation. wyIs813 = Punc-86::GFP::TBA-1 + Podr-1::RFP. ptrn-1(wy1990) = endogenous mScarlet::FLPon::PTRN-1. wyEx10741 = Pwrt-2::FLP + Podr-1::GFP.
TV30544	F47G4.4(ok2219) tba-1(ok1135) bmdSi350 I; wyIs813 II; ptrn-1(wy1990) X	F47G4.4(ok2219) = loss of function deletion mutation. tba-1(ok1135) = loss of function deletion mutation. bmdSi350 = loxN::Pwrt-2::FLP::P2A::H2B::2xmTurq2. wyIs813 = Punc-86::GFP::TBA-1 + Podr-1::RFP. ptrn-1(wy1990) = endogenous mScarlet::FLPon::PTRN-1.
TV29922	tba-1(ok1135) nmtn-1(tm5438) I; wyIs813 II; ptrn-1(wy1990) X; wyEx10741	tba-1(ok1135) = loss of function deletion mutation. nmtn-1(tm5438) = loss of function deletion mutation. wyIs813 = Punc-86::GFP::TBA-1 + Podr-1::RFP. ptrn-1(wy1990) = endogenous mScarlet::FLPon::PTRN-1. wyEx10741 = Pwrt-2::FLP + Podr-1::GFP.
TV29800	tba-1(ok1135) mei-1(or1178) nmtn-1(wy1980) I; wyIs813 II; wyEx10743	tba-1(ok1135) = loss of function deletion mutation. mei-1(or1178) = D166A missense mutation. nmtn-1(wy1980) = endogenous mScarlet::FLPon::NMTN-1. wyIs813 = Punc-86::GFP::TBA-1 + Podr-1::RFP. wyEx10743= Pwrt-2::FLP + Podr-1::GFP.
TV30543	F47G4.4(ok2219) tba-1(ok1135) nmtn-1(wy1980) bmdSi350 I; wyIs813 II	F47G4.4(ok2219) = loss of function deletion mutation. tba-1(ok1135) = loss of function deletion mutation. nmtn-1(wy1980) = endogenous mScarlet::FLPon::NMTN-1. bmdSi350 = loxN::Pwrt-2::FLP::P2A::H2B::2xmTurq2. wyIs813 = Punc-86::GFP::TBA-1 + Podr-1::RFP.
TV29859	tba-1(ok1135) nmtn-1(wy1980) I; wyIs813 II; ptrn-1(tm5597) X; wyEx10743	tba-1(ok1135) = loss of function deletion mutation. nmtn-1(wy1980) = endogenous mScarlet::FLPon::NMTN-1. wyIs813 = Punc-86::GFP::TBA-1 + Podr-1::RFP. ptrn-1(tm5597) = loss of function deletion mutation. wyEx10743 = Pwrt-2::FLP + Podr-1::GFP.
TV30062	tba-1(ok1135) nmtn-1(wy1980) I; ptrn-1(wy2066) X; wyEx10473	tba-1(ok1135) = loss of function deletion mutation. nmtn-1(wy1980) = endogenous mScarlet::FLPon::NMTN-1. ptrn-1(wy2066) = endogenous GFP::FLPon::PTRN-1. wyEx10743 = Pwrt-2::FLP + Podr-1::GFP.
TV31525	rab-10(wy1298) I; wySi968 V; glo-1(zu391) X	rab-10(wy1298) = endogenous GFP::FLPon::RAB-10. wySi968 = Pdes-2::FLP + Pdes-2::mcd8::mScarlet. glo-1(zu391) = loss of function mutation.
TV29395	mei-1(or1178) rab-10(wy1298) I; wySi968 V; glo-1(zu391) X	mei-1(or1178) = D166A missense mutation. rab-10(wy1298) = endogenous GFP::FLPon::RAB-10. wySi968 = Pdes-2::FLP + Pdes-2::mcd8::mScarlet. glo-1(zu391) = loss of function mutation.
TV30712	F47G4.4(ok2219) rab-10(wy1298) I; wySi968 V; glo-1(zu391) X	F47G4.4(ok2219) = loss of function deletion mutation. rab-10(wy1298) = endogenous GFP::FLPon::RAB-10. wySi968 = Pdes-2::FLP + Pdes-2::mcd8::mScarlet. glo-1(zu391) = loss of function mutation.
TV30555	rab-10(wy1298) I; wySi968 V; ptrn-1(tm5597) glo-1(zu391) X	rab-10(wy1298) = endogenous GFP::FLPon::RAB-10. wySi968 = Pdes-2::FLP + Pdes-2::mcd8::mScarlet. ptrn-1(tm5597) = loss of function deletion mutation. glo-1(zu391) = loss of function mutation.
TV31140	nmtn-1(tm5438) rab-10(wy1298) I; wySi968 V; glo-1(zu391) X	nmtn-1(tm5438) = loss of function deletion mutation. rab-10(wy1298) = endogenous GFP::FLPon::RAB-10. wySi968 = Pdes-2::FLP + Pdes-2::mcd8::mScarlet. glo-1(zu391) = loss of function mutation.
TV51447	wyIs50054 II	wyIs50054 = ser-2Prom3::TOMM-20(1-54AA)::GFP + ser-2Prom3::myri-mCherry + Podr-1::GFP.
TV29219	mei-1(or1178) I; WyIs50054 II	mei-1(or1178) = D166A missense mutation. wyIs50054 = ser-2Prom3::TOMM-20(1-54AA)::GFP + ser-2Prom3::myri-mCherry + Podr-1::GFP.
TV27770	rab-5(wy1333) I; wySi968 V; glo-1(zu391) X	rab-5(wy1333) = endogenous GFP::FLPon::RAB-5. wySi968 = Pdes-2::FLP + Pdes-2::mcd8::mScarlet. glo-1(zu391) = loss of function mutation.
TV30435	rab-5(wy1333) mei-1(or1178) I; wySi968 V; glo-1(zu391) X	mei-1(or1178) = D166A missense mutation. rab-5(wy1333) = endogenous GFP::FLPon::RAB-5. wySi968 = Pdes-2::FLP + Pdes-2::mcd8::mScarlet. glo-1(zu391) = loss of function mutation.
TV27694	rab-7(wy1390) II; wySi968 V; glo-1(zu391) X	rab-7(wy1390) = endogenous GFP::FLPon::RAB-7. wySi968 = Pdes-2::FLP + Pdes-2::mcd8::mScarlet. glo-1(zu391) = loss of function mutation.
TV30439	mei-1(or1178) I; rab-7(wy1390) II; wySi968 V; glo-1(zu391) X	mei-1(or1178) = D166A missense mutation. rab-7(wy1390) = endogenous GFP::FLPon::RAB-7. wySi968 = Pdes-2::FLP + Pdes-2::mcd8::mScarlet. glo-1(zu391) = loss of function mutation.

## Sheet: Supplementary Table 2
Construct	Vector	Insert
pDK04	pSM	Punc-86::MEI-1
pDK07	pSM	Pdes-2::PTRN-1a
pDK08	pSM	Pdes-2::NMTN-1b
pLX119	pSM	Pwrt-2::FLP

## Sheet: Supplementary Table 3
Allele generated	crRNA sequence
tba-1(wy2063)	GTTCGTTTTCAACATGCGTG
ptrn-1(wy1990)	AAGTCCATTGCAAGGACCCC
nmtn-1(wy1980)	TCCTATTATCCATTTTAGCA
ptrn-1(wy2066)	AAGTCCATTGCAAGGACCCC
rab-5(wy1333)	GGCGGTTCCTGCGTTTCGGG
mei-1(or1178)	TGGAGATTCATTCGATGCAT
nmtn-1(tm5438)	CGTGAAGCTGGTGTTATCAA
