# Supplementary material for: Katanin-mediated severing generates microtubules during neurite outgrowth
Source: Research Square preprint supplement (doi:10.21203/rs.3.rs-8782101/v1), 2026-02-10
Supplement: Supplementary file 2 [file d8463aeaa83ae570f656379a.docx]

**Supplementary Table Descriptions**

**Supplementary Table 1**

List of *C. elegans* strains used in this study.

**Supplementary Table 2**

List of plasmids used in this study.

**Supplementary Table 3**

List of guide crRNAs used in this study.

**Supplementary Video Descriptions**

**Video S1. Microtubule dynamics during neurite outgrowth.**

Microtubules labeled by GFP::TBA-1 are constantly polymerizing and depolymerizing. Individual filaments can be seen in the cell body and posterior dendrite. Corresponding kymograph in Fig. 1c. Total time-lapse is 60 seconds. Scale bar, 10 μm.

**Video S2. Microtubule severing in posterior dendrite.**

Microtubule labeled by GFP::TBA-1 in PVD posterior dendrite gets severed, resulting in a gap in microtubule signal within the process. Corresponding kymograph in Fig. 1d. Total time-lapse is 60 seconds. Scale bar, 10 μm.
